# Supplementary material
Source: Springer Nature journal article supplement (https://www.springermedizin.de/resource/supplementary/12990_2009_244_MOESM4_ESM.pdf/9612870)

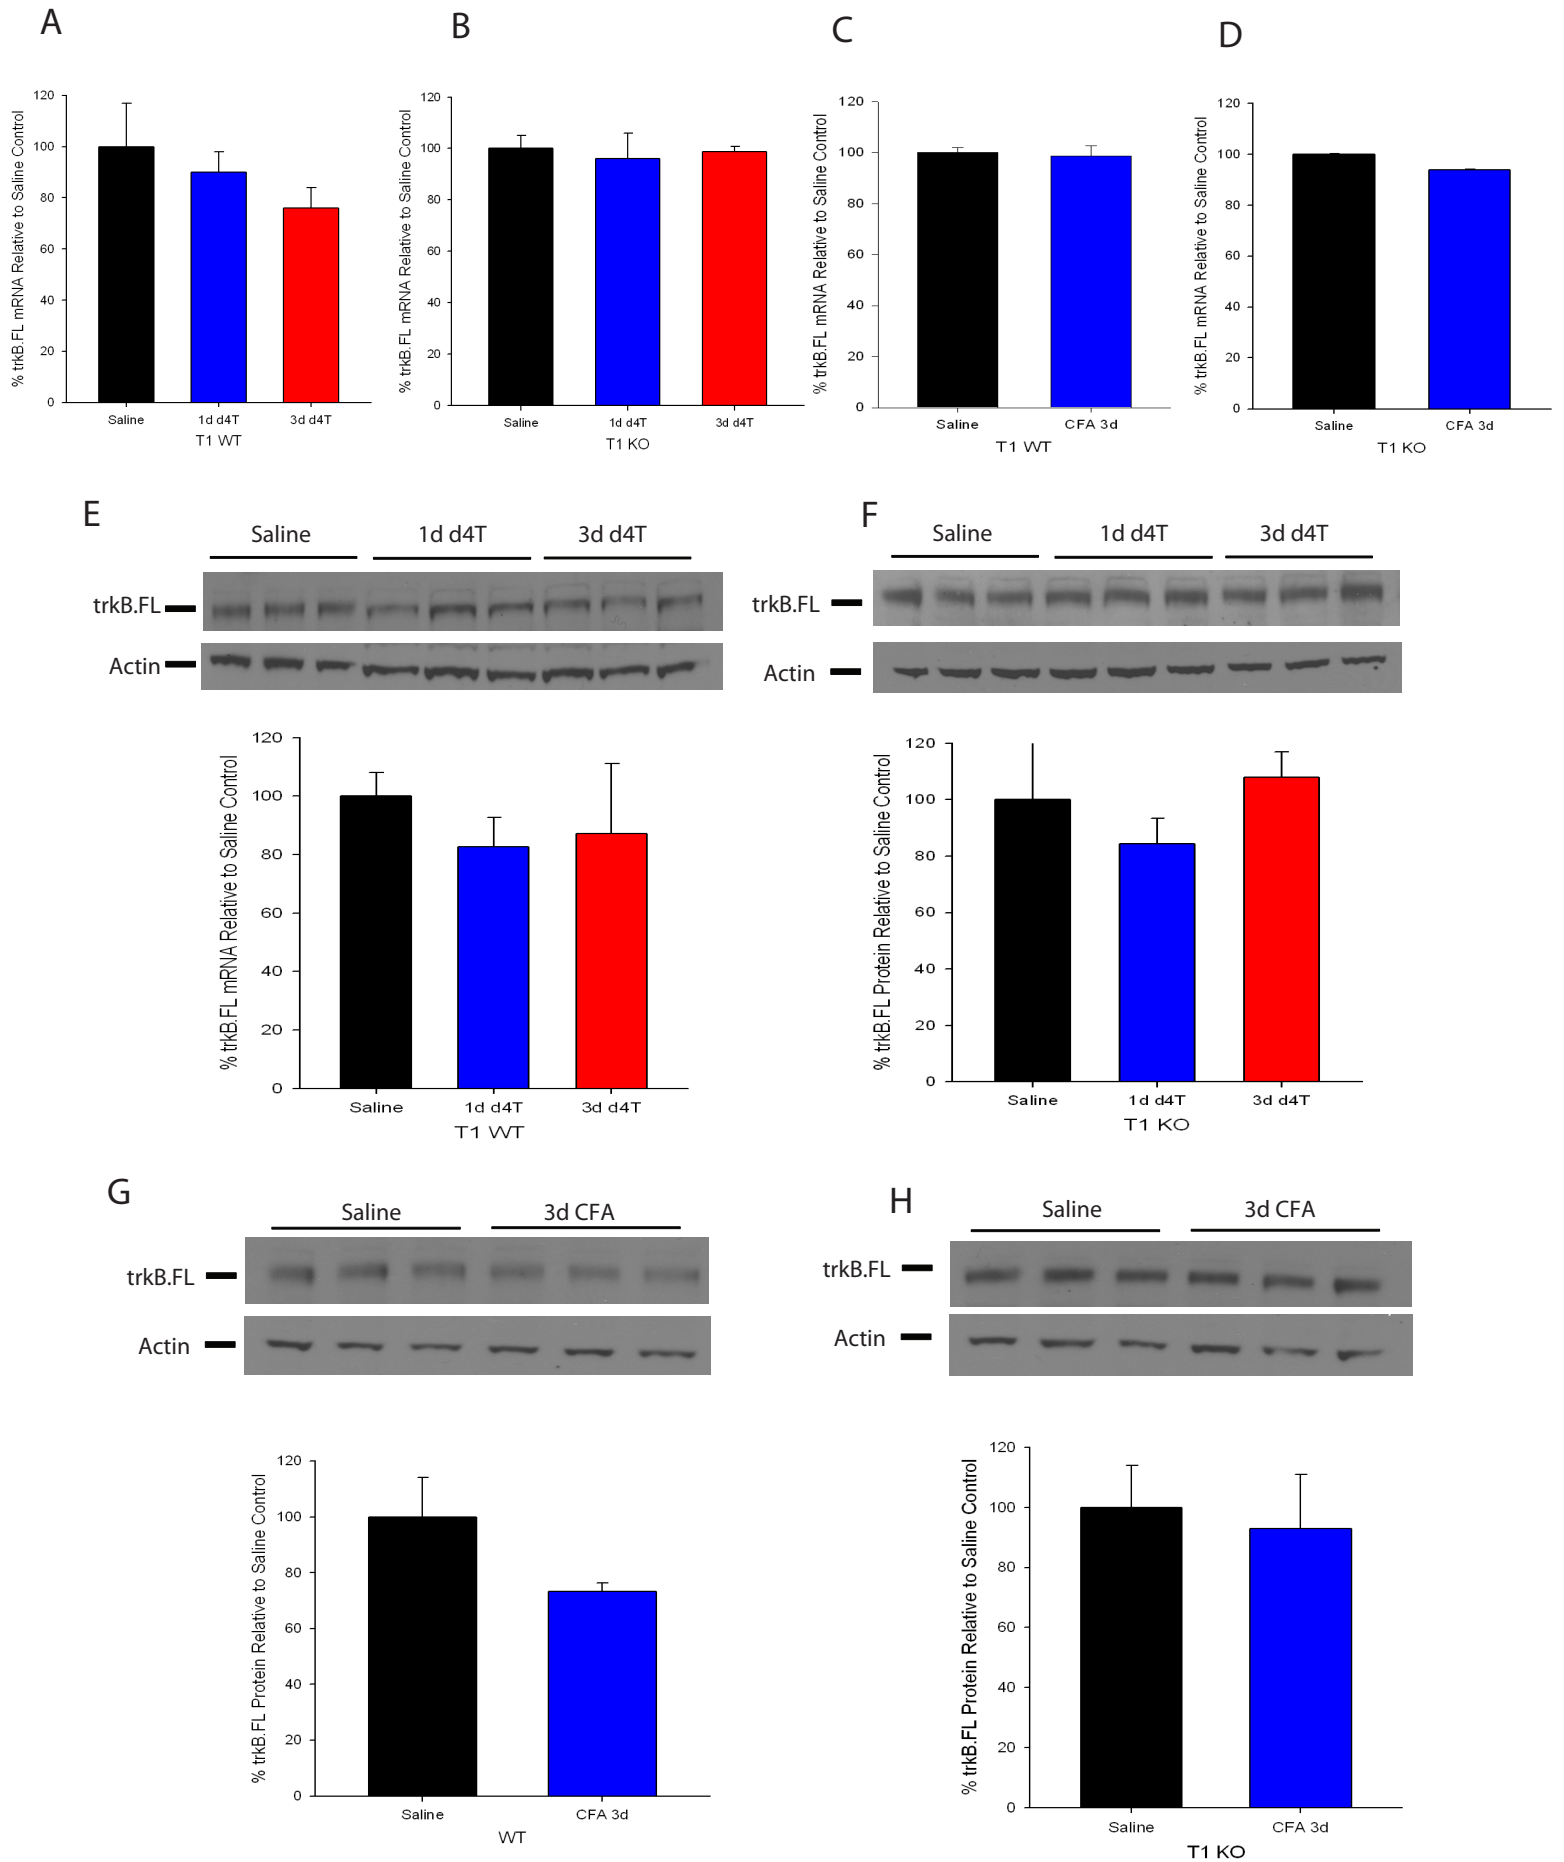

Supplement: MOESM4 [file 9612870]
